# Supplementary material
Source: PubMed Central journal article supplement (PMC6059376)
Supplement: NIHMS77759-supplement-Supplementary_information.pdf [file NIHMS77759-supplement-Supplementary_information.pdf]

## Supplementary Information

Title: PIP<sub>2</sub> stabilises active states of GPCRs and enhances the selectivity of G-protein coupling

Authors : Hsin-Yung Yen<sup>1,2</sup>, Kin Kuan Hoi<sup>1</sup>, Idir Liko<sup>1,2</sup>, George Hedger<sup>3</sup>, Michael R. Horrell<sup>3</sup>, Wanling Song<sup>3</sup>, Di Wu<sup>1</sup>, Philipp Heine<sup>4</sup>, Tony Warne<sup>5</sup>, Yang Lee<sup>5</sup>, Byron Carpenter<sup>5,†</sup>, Andreas Plückthun<sup>4</sup>, Christopher G. Tate<sup>5</sup>, Mark S. P. Sansom<sup>3,\*</sup>, Carol V. Robinson<sup>1,\*</sup>

### Affiliations:

1Chemical Research Laboratory, South Parks Road, University of Oxford, OX1 3QY, U.K.

2OMass Technologies Ltd., Begbroke Science Park, Woodstock Rd, Yarnton, Kidlington OX5 1PF, U.K.

3Department of Biochemistry, South Parks Road, University of Oxford, OX1 3QU, U.K.

4Biochemisches Institut, Universität Zürich, Winterthurerstr. 190 CH-8057, Zürich, Switzerland.

5 MRC Laboratory of Molecular Biology, Francis Crick Avenue, Cambridge Biomedical Campus, Cambridge CB2 0QH, U.K.

\*Correspondence to: mark.sansom@bioch.ox.ac.uk and carol.robinson@chem.ox.ac.uk.

† Current address: Warwick Integrative Synthetic Biology Centre, School of Life Sciences, Gibbet Hill Campus, The University of Warwick, Coventry, UK

### Note on the strategy of the protocol to confirm lipid identities

Our methodology is not designed to identify all lipids that co-purify with receptors under different detergent environments. Rather we first identify those lipid classes that bind preferentially by directly detecting protein-lipid interactions by native MS and identifying the bound lipids through tandem MS. In our experiments two lipid classes were identified (PS and PIP) bound to all three receptors. Lipids with low affinity are ejected during collisional activation, during the removal of the detergent micelle in the MS, leaving only lipids with high binding affinity. Subsequently we incubate receptors with known concentrations of the lipids identified (from the PS and PIP classes) and use titration and competition experiments to identify PIP<sub>2</sub> from the PIP class, as the preferred interactor. We then investigate the effects of PIP<sub>2</sub> on the receptor structure and function.

### Note on the composition of different membranes

The receptors used here were isolated either from insect cells or *E. coli* membranes raising concerns about the differences in composition between these cell membranes and those in mammalian systems. Several lipidomics studies of insect cell membranes have addressed the similar abundance of common phospholipids identified in mammalian membranes such as PE, PC, PI and cardiolipin<sup>54</sup> (ISSN 0014-

5793). These lipids were also observed in our lipidomics analysis. Sphingolipids and sterols are also present in insect cell membranes although the types and structural features may differ from mammalian membranes. Cholesterol has been identified in several insect cell lines with a lower expression level than in mammalian cells (around 20-40% compared to mammalian cells)<sup>55</sup>. We did not observe any cholesterol bound to receptor or present in our lipidomics study. The impact of cholesterol on modulating GPCRs, especially their conformational stability, has been widely studied and cholesterol is often present in X-ray structures<sup>56-58</sup>. For example, the presence of cholesterol at the surface between TM1 to TM4 of  $\beta_2$ AR increases kinetic, energetic, and mechanical stability of receptor as well as potentially modulates receptor dimerization<sup>56,57,59</sup>. Furthermore, cholesterol increases the stability of NTSR1 in the detergent micelles but shows no effect when the receptor is reconstituted in lipid nanodiscs<sup>60</sup>. MD simulations indicate the highly dynamic nature of cholesterol binding hot-spots, suggesting that these sites have high occupancy rather than specific binding<sup>61</sup>. All these studies highlight the importance of the presence of cholesterol, however the detailed mechanism of its interaction remains inconclusive.

### Note on the use CGMD Simulations of Protein-Lipid Interactions

The simulations use coarse-grained (CG) MD simulations with the Martini forcefield. This methodology is well established for the study of membrane proteins and their interactions with lipids<sup>62,63</sup>. The primary strength of the approach is long simulations are possible and so one can fully sample the interactions of membrane proteins with (slowly diffusing) lipids<sup>64</sup>, which remains challenging for all atom simulations. Furthermore, the approach has been carefully validated for a number of membrane proteins whose lipid interactions are well understood experimentally (see below). Furthermore, recent studies from our group have suggested that atomistic force-fields may actually *overestimate* the strength of protein-lipid interactions and thus further work is need to refine these models<sup>65</sup>. The primary limitation of the CG method is one does not get full atomic resolution detail for the predicted interactions. However, when needed this can be obtained by a multiscale approach in which the CG structure is converted back to atomic resolution and an all atomic simulation then performed<sup>66</sup>.

In terms of lipid specificity, we have previously employed two canonical membrane proteins, whose protein/lipid interactions have been characterised both structurally and functionally, namely: (i) the mitochondrial ATP/ADP transporter ANT1, which has three binding sites specific for cardiolipin seen in the crystal structure (CL); and (ii) inward rectifier potassium (Kir) channels the PIP<sub>2</sub> binding site of which has also been resolved at high resolution by X-ray crystallography. In both of these cases, we have demonstrated the ability of CGMD simulations to distinguish between specific and ‘annular’ lipid interactions, e.g. comparing the interactions of ANT with CL vs. PS or vs. PC<sup>67</sup> or of Kir channels with PIP<sub>2</sub> vs. PS<sup>68</sup>.

### References

- 54 Marheineke, K., Grunewald, S., Christie, W. & Reilander, H. Lipid composition of *Spodoptera frugiperda* (Sf9) and *Trichoplusia ni* (Tn) insect cells used for baculovirus infection. *FEBS Lett* **441**, 49-52, (1998).
- 55 Hafer, A., Whittlesey, R., Brown, D. T. & Hernandez, R. Differential incorporation of cholesterol by Sindbis virus grown in mammalian or insect cells. *J. Virol* **83**, 9113-9121, (2009).
- 56 Cherezov, V. *et al.* High-resolution crystal structure of an engineered human beta2-

- adrenergic G protein-coupled receptor. *Science* **318**, 1258-1265, (2007).
- 57 Hedger, G. & Sansom, M. S. P. Lipid interaction sites on channels, transporters and receptors: Recent insights from molecular dynamics simulations. *Biochimica et Biophysica Acta- Biomembranes* **1858**, 2390-2400, (2016).
- 58 Guixa-Gonzalez, R. *et al.* Membrane cholesterol access into a G-protein-coupled receptor. *Nat. Commun.* **8**, 14505, (2017).
- 59 Zocher, M., Zhang, C., Rasmussen, S. G., Kobilka, B. K. & Muller, D. J. Cholesterol increases kinetic, energetic, and mechanical stability of the human beta2-adrenergic receptor. *Proc. Natl. Acad. Sci. U. S. A.* **109**, E3463-3472, (2012).
- 60 Oates, J. *et al.* The role of cholesterol on the activity and stability of neurotensin receptor 1. *Biochim Biophys Acta* **1818**, 2228-2233, (2012).
- 61 Sengupta, D. & Chattopadhyay, A. Molecular dynamics simulations of GPCR-cholesterol interaction: An emerging paradigm. *Biochim Biophys Acta* **1848**, 1775-1782, (2015).
- 62 Marrink, S. J. & Tieleman, D. P. Perspective on the Martini model. *Chem. Soc. Rev.* **42**, 6801-6822, (2013).
- 63 Hedger, G. & Sansom, M. S. P. Lipid interaction sites on channels, transporters and receptors: recent insights from molecular dynamics simulations. *Biochim. Biophys. Acta* **1858**, 2390–2400, (2016).
- 64 Domański, J., Hedger, G., Best, R., Stansfeld, P. J. & Sansom, M. S. P. Convergence and sampling in determining free energy landscapes for membrane protein association. *J. Phys. Chem. B.* **121**, 3364–3375, (2017).
- 65 Domański, J., Sansom, M. S. P., Stansfeld, P. J. & Best, R. B. Balancing protein-lipid interactions to capture transmembrane helix-helix association. *J. Chem. Theor. Comput.* (**minor revisions submitted**), (2018).
- 66 Stansfeld, P. J. & Sansom, M. S. P. From coarse-grained to atomistic: a serial multi-scale approach to membrane protein simulations. *J. Chem. Theor. Comp.* **7**, 1157–1166, (2011).
- 67 Hedger, G. *et al.* Lipid loving ANTs: molecular simulations of cardiolipin interactions and the organization of the adenine nucleotide translocase in model mitochondrial membranes. *Biochemistry* **55**, 6238–6249, (2016).
- 68 Schmidt, M. R., Stansfeld, P. J., Tucker, S. J. & Sansom, M. S. P. Simulation-based prediction of phosphatidylinositol 4,5-bisphosphate binding to an ion channel. *Biochem.* **52**, 279-281, (2013).
